# Supplementary material for: The Function of Termicin from Odontotermes formosanus (Shiraki) in the Defense against Bacillus thuringiensis (Bt) and Beauveria bassiana (Bb) Infection
Source: MDPI journal article supplement (doi:10.3390/insects15050360), 2024-05-16
Supplement: s1 [file s1]

**Table S1.** Primers used in this study [27].

| Gene Name          | Orientation | (5' → 3') Primer Sequence                                   | Purpose                                             |
|--------------------|-------------|-------------------------------------------------------------|-----------------------------------------------------|
| <i>Oftermicin1</i> | Forward     | <i>ATTT</i> <u><b>GCGGCCGC</b></u> AGGACTGTCGCTAT           | RNAi                                                |
|                    | Reverse     | CCC <u><b>AAGCTT</b></u> GCCCCCAGTAACATACA                  |                                                     |
|                    | Forward     | CTAGTCTTCCTGGTAGTGTTTG                                      | Internal references and standard curves for qRT-PCR |
|                    | Reverse     | CAAGTGGGTCCATCACAGAA                                        |                                                     |
| <i>Oftermicin2</i> | Forward     | <i>ATTT</i> <u><b>GCGGCCGC</b></u> CAAGACCGTTACTAGCCTACTTGT | RNAi                                                |
|                    | Reverse     | CCC <u><b>AAGCTT</b></u> GCCGTTAGGATTATACACACAT             |                                                     |
|                    | Forward     | CCGTTACTAGCCTACTTGTCTTT                                     | Internal references and standard curves for qRT-PCR |
|                    | Reverse     | GTCCATCACAGAACGCTCTTA                                       |                                                     |
| <i>dsGFP</i>       | Forward     | <i>ATC</i> <u><b>GGAGCT</b></u> CAGTTGAACGGATCCATCTTCA      | RNAi and standard curves for qRT-PCR                |
|                    | Reverse     | CCC <u><b>AAGCTT</b></u> AGAACTTTTCACTGGA                   |                                                     |
| <i>RPS18</i>       | Forward     | ATGGCAAACCCCGTCAGTA                                         | Internal references for qRT-PCR                     |
|                    | Reverse     | CATACCACGATGCGCACGAA                                        |                                                     |
| <i>GAPDH</i>       | Forward     | TCGTATTGGCCGTCTTGTGC                                        | Internal references for qRT-PCR                     |
|                    | Reverse     | AGCGACCATGGGTGGAATCAT                                       |                                                     |

Note: The primer underline is the restriction site, and 3–4 letters in front of the underline are protective bases.
